# Supplementary material for: Host DNA contents in fecal metagenomics as a biomarker for intestinal diseases and effective treatment
Source: PubMed Central journal article supplement (PMC7216530; doi:10.1186/s12864-020-6749-z), 2020-05-11

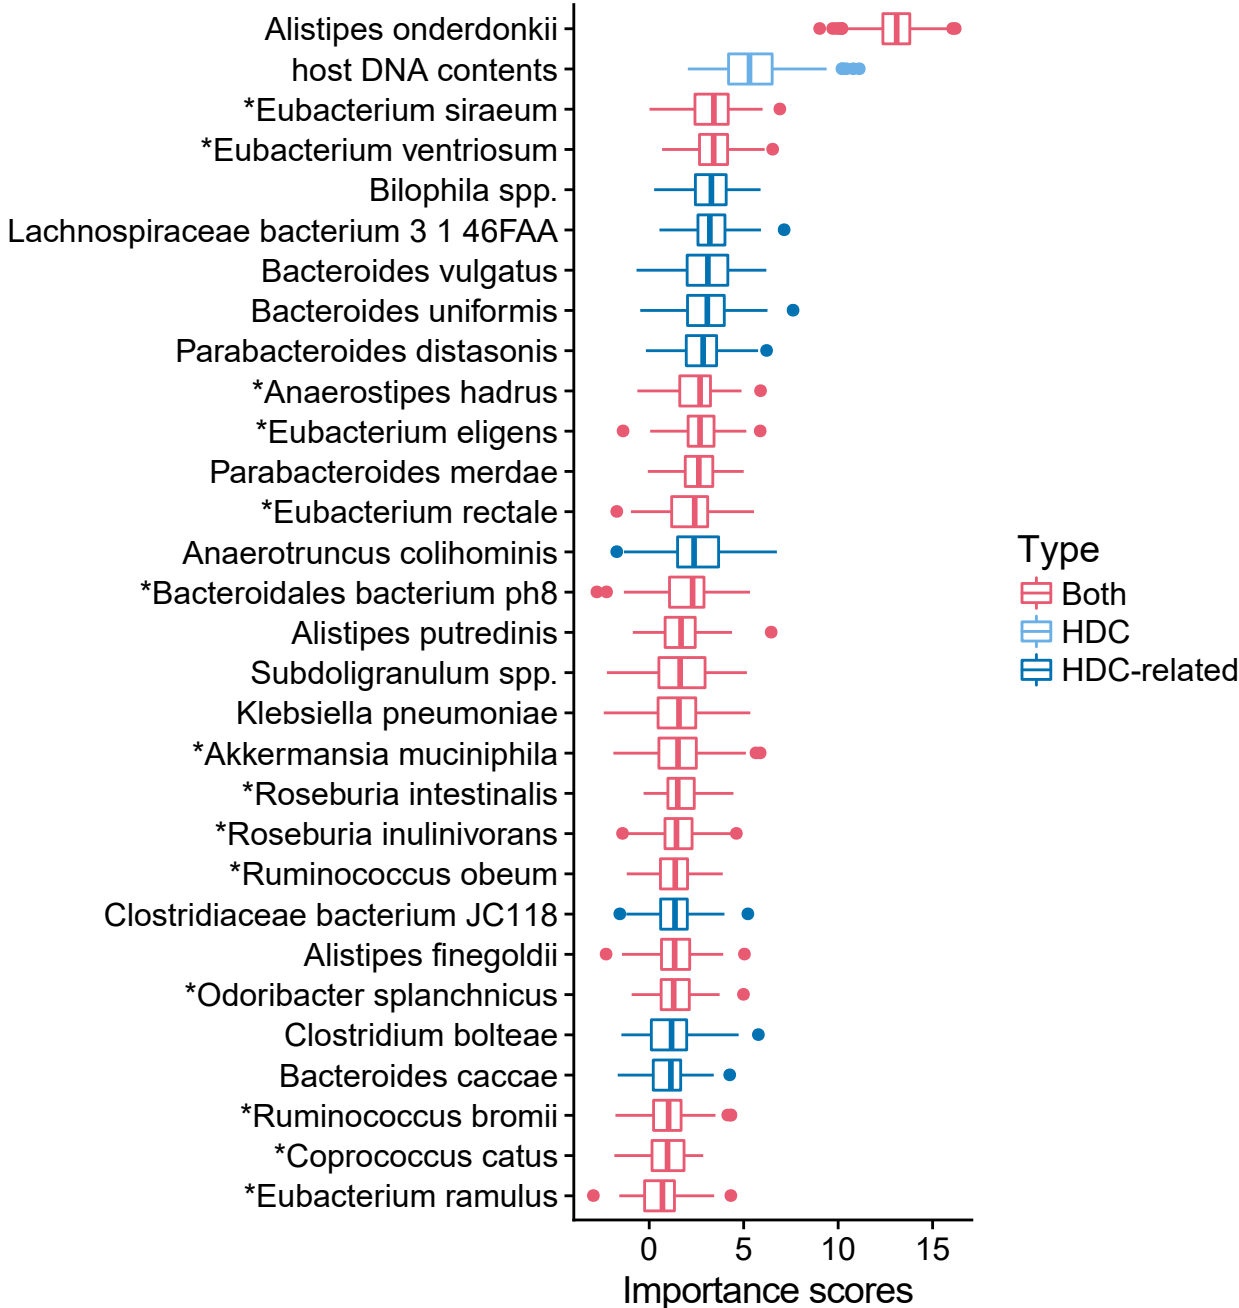

Supplement: 12864_2020_6749_MOESM16_ESM.pdf [file 12864_2020_6749_MOESM16_ESM.pdf]
